# Supplementary material for: The Mystery of the Benzene‐Oxide/Oxepin Equilibrium—Heavy‐Atom Tunneling Reversed by Solvent Interactions
Source: PubMed Central journal article supplement — Angew Chem Int Ed Engl. 2020 Sep 30;59(46):20318–22. doi: 10.1002/anie.202010452 (PMC7702039; doi:10.1002/anie.202010452), 2020-09-30
Supplement: ANIE-59-20318-s001.pdf [file ANIE-59-20318-s001.pdf]

Supporting Information

**The Mystery of the Benzene-Oxide/Oxepin Equilibrium—Heavy-Atom Tunneling Reversed by Solvent Interactions**

*Tim Schleif<sup>†</sup>, Melania Prado Merini<sup>†</sup>, and Wolfram Sander\**

anie\_202010452\_sm\_miscellaneous\_information.pdf

## Supporting Information

### Contents

|                                        |    |
|----------------------------------------|----|
| <b>IR spectroscopic data</b> .....     | 2  |
| <b>Experimental kinetic data</b> ..... | 3  |
| <b>Calculated complexes</b> .....      | 5  |
| <b>Synthesis</b> .....                 | 7  |
| <b>Z-Matrices</b> .....                | 8  |
| <b>Literature references</b> .....     | 19 |

### IR spectroscopic data

#### Methodology

Matrix isolation experiments were performed by standard techniques using two-staged closed-cycle helium cryostats (cooling power 1 W at 4 K) to obtain temperatures around 3 K. The

matrices were generated by co-deposition of the mixture of **1** and **2** with a large excess of argon (doped with 1% of H<sub>2</sub>O or ICF<sub>3</sub>) on top of a cold CsI window at 3 K. FTIR spectra were recorded in the range between 400 and 4000 cm<sup>-1</sup> with 0.5 cm<sup>-1</sup> resolution, often passing the IR beam of the spectrometer through an IR long pass interference filter (passing ≥ 2200 cm<sup>-1</sup>).

**Table S1.** IR spectroscopic data of benzene oxide **1**.

| Mode    | DFT <sup>[a]</sup><br>$\tilde{\nu}/\text{cm}^{-1}$ ( <i>I</i> <sub>abs</sub> ) | CC <sup>[b]</sup><br>$\tilde{\nu}/\text{cm}^{-1}$ ( <i>I</i> <sub>abs</sub> ) | Argon <sup>[c]</sup><br>$\tilde{\nu}/\text{cm}^{-1}$ ( <i>I</i> <sub>rel</sub> ) | Assignment <sup>[d]</sup> |
|---------|--------------------------------------------------------------------------------|-------------------------------------------------------------------------------|----------------------------------------------------------------------------------|---------------------------|
| 26      | 1640 (2)                                                                       | 1601 (2)                                                                      | 1555 (1)                                                                         | C=C stretch               |
| 25      | 1477 (10)                                                                      | 1465 (12)                                                                     | 1434 (13)                                                                        | C=C stretch               |
| 24      | 1440 (3)                                                                       | 1425 (4)                                                                      |                                                                                  | C-H scis.                 |
| 23      | 1414 (5)                                                                       | 1394 (4)                                                                      | 1397 (4)                                                                         | C-H scis. + C-O stretch.  |
| 21      | 1287 (13)                                                                      | 1264 (8)                                                                      | 1213 (2)                                                                         | C-H scis. + C-O stretch.  |
| 20      | 1211 (1)                                                                       | 1202 (1)                                                                      | 1183 (1)                                                                         | C-H rock.                 |
| 19      | 1196 (5)                                                                       | 1186 (5)                                                                      | 1164 (6)                                                                         | C-H scis.                 |
| 17      | 1079 (12)                                                                      | 1065 (14)                                                                     | 1046 (11)                                                                        | C-H scis. + C-O stretch.  |
| 16      | 1037 (20)                                                                      | 1007 (29)                                                                     | 988 (18)                                                                         | C-H scis.                 |
| 15      | 1027 (8)                                                                       | 988 (10)                                                                      | 967 (8)                                                                          | C-H rock.                 |
| 13 (14) | 995 (2)                                                                        | 968 (5)                                                                       |                                                                                  |                           |
| 12 (13) | 980 (5)                                                                        | 955 (10)                                                                      | 953 (4)                                                                          | C-H wag.                  |
| 11 (12) | 954 (16)                                                                       | 931 (19)                                                                      | 921 (9)                                                                          | C-H wag. + C-O stretch.   |
| 9       | 805 (72)                                                                       | 791 (100)                                                                     | 772 (100)                                                                        | C-H wag. + C-O stretch.   |
| 7       | 725 (21)                                                                       | 703 (30)                                                                      | 691 (25)                                                                         | C-H scis. + C-O stretch.  |
| 5 (6)   | 633 (12)                                                                       | 600 (20)                                                                      | 610 (9)                                                                          | C-C stretch.              |
| 3       | 467 (12)                                                                       | 459 (18)                                                                      | 456 (11)                                                                         | C-H wag.                  |

[a] Calculated at M06-2X-D3/def2-TZVP level of theory. [b] Calculated at CCSD(T)/def2-TZVP level of theory. [c] Argon matrix at 3 K. [d] Tentative assignment.

**Table S2.** IR spectroscopic data of oxepin **2**.

| Mode    | DFT <sup>[a]</sup><br>$\tilde{\nu}/\text{cm}^{-1}$ ( <i>I</i> <sub>abs</sub> ) | CC <sup>[b]</sup><br>$\tilde{\nu}/\text{cm}^{-1}$ ( <i>I</i> <sub>abs</sub> ) | Argon <sup>[c]</sup><br>$\tilde{\nu}/\text{cm}^{-1}$ ( <i>I</i> <sub>rel</sub> ) | Assignment <sup>[d]</sup> |
|---------|--------------------------------------------------------------------------------|-------------------------------------------------------------------------------|----------------------------------------------------------------------------------|---------------------------|
| 26      | 1700(20)                                                                       | 1658 (23)                                                                     | 1614 (17)                                                                        | C=C stretch               |
| 21      | 1281 (52)                                                                      | 1272 (50)                                                                     | 1242 (42)                                                                        | C-H scis. + C-O stretch.  |
| 20      | 1239 (5)                                                                       | 1228 (6)                                                                      | 1206 (5)                                                                         | C-H scis.                 |
| 18      | 1116 (63)                                                                      | 1101 (70)                                                                     | 1079 (81)                                                                        | C-H rock.                 |
| 16 (17) | 1011 (11)                                                                      | 988 (12)                                                                      | 971 (12)                                                                         | C-H rock.                 |
| 12      | 945 (4)                                                                        | 916 (5)                                                                       | 903 (6)                                                                          | C-C stretch.              |
| 11      | 921 (2)                                                                        | 895 (2)                                                                       | 893 (5)                                                                          | C-H rock.                 |
| 10      | 853 (7)                                                                        | 834 (7)                                                                       | 831 (8)                                                                          | C-H wag.                  |
| 9 (8)   | 787 (25)                                                                       | 758 (25)                                                                      | 751 (17)                                                                         | C-H wag.                  |
| 7       | 771 (95)                                                                       | 752 (100)                                                                     | 738 (100)                                                                        | C-H wag.                  |

[a] Calculated at M06-2X-D3/def2-TZVP level of theory. [b] Calculated at CCSD(T)/def2-TZVP level of theory. [c] Argon matrix at 3 K. [d] Tentative assignment.

**Table S3.** IR spectroscopic data of complex **1**·ICF<sub>3</sub>.

| Mode | <i>endo-1</i> ·ICF <sub>3</sub><br><sup>[a]</sup><br>$\tilde{\nu}/\text{cm}^{-1}$ ( <i>I</i> <sub>abs</sub> ) | <i>exo-1</i> ·ICF <sub>3</sub><br><sup>[a]</sup><br>$\tilde{\nu}/\text{cm}^{-1}$ ( <i>I</i> <sub>abs</sub> ) | Ar/1% ICF <sub>3</sub> <sup>[b]</sup><br>$\tilde{\nu}/\text{cm}^{-1}$ ( <i>I</i> <sub>rel</sub> ) | Assignment <sup>[c]</sup> |
|------|---------------------------------------------------------------------------------------------------------------|--------------------------------------------------------------------------------------------------------------|---------------------------------------------------------------------------------------------------|---------------------------|
|------|---------------------------------------------------------------------------------------------------------------|--------------------------------------------------------------------------------------------------------------|---------------------------------------------------------------------------------------------------|---------------------------|

|    |            |            |            |                          |
|----|------------|------------|------------|--------------------------|
| 40 | 1476 (11)  | 1477 (13)  | 1433 (7)   | C-C stretch.             |
| 39 | 1439 (5)   | 1440 (5)   | 1398 (4)   | C-H scis.                |
| 35 | 1228 (243) | 1234 (243) | 1150 (76)  | C-F stretch.             |
| 34 | 1225 (242) | 1231 (243) |            |                          |
| 30 | 1124 (659) | 1123 (672) | 1081 (100) | C-I stretch.             |
| 28 | 1036 (40)  | 1034 (40)  | 984 (15)   | C-H wag.                 |
| 23 | 954 (34)   | 955 (18)   | 919 (16)   | C-H wag. + C-O stretch.  |
| 21 | 806 (90)   | 808 (70)   | 773 (64)   | C-H wag. + C-O stretch.  |
| 18 | 724 (13)   | 726 (52)   | 686 (15)   | C-H scis. + C-O stretch. |

[a] Calculated at M06-2X-D3/def2-TZVP level of theory. [b] Argon matrix doped with 1% ICF<sub>3</sub> at 3 K. [c] Tentative assignment.

**Table S4.** IR spectroscopic data of complex **2**·ICF<sub>3</sub>.

| Mode  | <i>endo-2</i> ·ICF <sub>3</sub> <sup>[a]</sup><br>$\tilde{\nu}/\text{cm}^{-1}$ ( <i>I</i> <sub>abs</sub> ) | <i>exo-2</i> ·ICF <sub>3</sub> <sup>[a]</sup><br>$\tilde{\nu}/\text{cm}^{-1}$ ( <i>I</i> <sub>abs</sub> ) | Ar/1% ICF <sub>3</sub> <sup>[b]</sup><br>$\tilde{\nu}/\text{cm}^{-1}$ ( <i>I</i> <sub>rel</sub> ) | Assignment <sup>[c]</sup> |
|-------|------------------------------------------------------------------------------------------------------------|-----------------------------------------------------------------------------------------------------------|---------------------------------------------------------------------------------------------------|---------------------------|
| 42    | 1730 (19)                                                                                                  | 1733 (28)                                                                                                 |                                                                                                   |                           |
| 41    | 1707 (17)                                                                                                  | 1708 (19)                                                                                                 | 1634 (6)                                                                                          | C=C stretch.              |
| 40    | 1665 (6)                                                                                                   | 1664 (12)                                                                                                 | 1615 (10)                                                                                         |                           |
| 36    | 1275 (43)                                                                                                  | 1271 (53)                                                                                                 | 1231 (32)                                                                                         | C-H scis.                 |
| 33/35 | 1231 (242)                                                                                                 | 1237 (247)                                                                                                | 1165 (100)                                                                                        | C-F stretch.              |
| 32/34 | 1228 (243)                                                                                                 | 1236 (239)                                                                                                |                                                                                                   |                           |
| 31    | 1122 (661)                                                                                                 | 1124 (711)                                                                                                | 1067 (86)                                                                                         | C-I stretch.              |
| 28    | 1013 (22)                                                                                                  | 1007 (40)                                                                                                 | 972 (15)                                                                                          | C-C wag.                  |
| 24    | 979 (14)                                                                                                   | 947 (18)                                                                                                  | 910 (21)                                                                                          | C-C stretch.              |
| 19/18 | 774 (99)                                                                                                   | 765 (109)                                                                                                 | 738 (88)                                                                                          | C-H wag.                  |

[a] Calculated at M06-2X-D3/def2-TZVP level of theory. [b] Argon matrix doped with 1% ICF<sub>3</sub> at 3 K. [c] Tentative assignment.

**Table S5.** IR spectroscopic data of complex **1**·H<sub>2</sub>O.

| Mode | <i>endo-a-1</i> ·H <sub>2</sub> O                                  | <i>endo-b-1</i> ·H <sub>2</sub> O                                  | <i>exo-1</i> ·H <sub>2</sub> O [a]               | Ar/1% H <sub>2</sub> O                                             | Assignment <sup>[c]</sup> |
|------|--------------------------------------------------------------------|--------------------------------------------------------------------|--------------------------------------------------|--------------------------------------------------------------------|---------------------------|
|      | <sup>[a]</sup><br>$\tilde{\nu}/\text{cm}^{-1}$ (I <sub>abs</sub> ) | <sup>[a]</sup><br>$\tilde{\nu}/\text{cm}^{-1}$ (I <sub>abs</sub> ) | $\tilde{\nu}/\text{cm}^{-1}$ (I <sub>abs</sub> ) | <sup>[b]</sup><br>$\tilde{\nu}/\text{cm}^{-1}$ (I <sub>rel</sub> ) |                           |
| 31   | 1477 (13)                                                          | 1473 (11)                                                          | 1477 (13)                                        | 1435 (15)                                                          | C-C stretch.              |
| 29   | 1413 (7)                                                           | 1408 (7)                                                           | 1411 (3)                                         | 1398 (5)                                                           | C-H scis.                 |
| 27   | 1288 (14)                                                          | 1286 (15)                                                          | 1291 (16)                                        | 1247 (5)                                                           | C-H wag.                  |
| 25   | 1201 (5)                                                           | 1191 (5)                                                           | 1196 (6)                                         | 1166 (10)                                                          | C-H rock.                 |
| 22   | 1037(26)                                                           | 1033 (26)                                                          | 1033 (23)                                        | 984 (31)                                                           | C-H wag.                  |
| 17   | 958 (20)                                                           | 954 (19)                                                           | 956 (17)                                         | 918 (46)                                                           | C-H wag. + C-O stretch.   |
| 15   | 809 (77)                                                           | 806 (73)                                                           | 811 (74)                                         | 919 (16)                                                           | C-H wag. + C-O stretch.   |
| 13   | 724 (16)                                                           | 721 (21)                                                           | 724 (29)                                         | 773 (64)                                                           | C-H wag. + C-O stretch.   |

[a] Calculated at M06-2X-D3/def2-TZVP level of theory. [b] Argon matrix doped with 1% H<sub>2</sub>O at 3 K. [c] Tentative assignment.

**Table S6.** IR spectroscopic data of complex **2**·H<sub>2</sub>O.

| Mode | <i>endo-a-2</i> ·H <sub>2</sub> O                                  | <i>endo-b-2</i> ·H <sub>2</sub> O                                  | <i>exo-2</i> ·H <sub>2</sub> O                                     | Ar/1% H <sub>2</sub> O                                             | Assignment <sup>[c]</sup> |
|------|--------------------------------------------------------------------|--------------------------------------------------------------------|--------------------------------------------------------------------|--------------------------------------------------------------------|---------------------------|
|      | <sup>[a]</sup><br>$\tilde{\nu}/\text{cm}^{-1}$ (I <sub>abs</sub> ) | <sup>[a]</sup><br>$\tilde{\nu}/\text{cm}^{-1}$ (I <sub>abs</sub> ) | <sup>[a]</sup><br>$\tilde{\nu}/\text{cm}^{-1}$ (I <sub>abs</sub> ) | <sup>[b]</sup><br>$\tilde{\nu}/\text{cm}^{-1}$ (I <sub>rel</sub> ) |                           |
| 27   | 1276 (49)                                                          | 1271 (43)                                                          | 1270 (43)                                                          | 1233 21)                                                           | C=C stretch.              |
| 24   | 1113 (61)                                                          | 1111 (58)                                                          | 1106 (62)                                                          | 1070 (50)                                                          | C=C stretch.              |
| 19   | 973 (4)                                                            | 976 (5)                                                            | 972 (4)                                                            | 1010 (1)                                                           | C-H wag.                  |
| 16   | 852 (7)                                                            | 849 (9)                                                            | 850 (7)                                                            | 831 (2)                                                            | C-H wag..                 |
| 14   | 784 (9)                                                            | 778 (8)                                                            | 785 (2)                                                            | 752(10)                                                            | C-H wag. + C-O stretch.   |

[a] Calculated at M06-2X-D3/def2-TZVP level of theory. [b] Argon matrix doped with 1% H<sub>2</sub>O at 3 K. [c] Tentative assignment.

**Table S7.** IR spectroscopic data of 2-oxabicyclo[3.2.0]hepta-3,6-diene.

| Mode | DFT <sup>[a]</sup>                                | Argon <sup>[b]</sup>                              | Assignment <sup>[c]</sup>   |
|------|---------------------------------------------------|---------------------------------------------------|-----------------------------|
|      | $\tilde{\nu}/\text{cm}^{-1}$ ( $I_{\text{abs}}$ ) | $\tilde{\nu}/\text{cm}^{-1}$ ( $I_{\text{rel}}$ ) |                             |
| 24   | 1342 (36)                                         | 1300 (76)                                         | C-H rock. + C-C stretch.    |
| 20   | 1218 (12)                                         | 1178 (26)                                         | C-H scis.                   |
| 19   | 1182 (68)                                         | 1140 (100)                                        | C-H scis. + C-O stretch.    |
| 18   | 1140 (6)                                          | 1099 (27)                                         | C-H scis. + C-C stretch.    |
| 17   | 1095 (41)                                         | 1044 (23)                                         | C-H scis. + C-O stretch.    |
| 16   | 1044 (9)                                          | 1012 (25)                                         | C-H scis.                   |
| 14   | 998 (42)                                          | 942 (86)                                          | C-C stretch. + C-O stretch. |
| 9    | 887 (17)                                          | 860 (55)                                          | C-H wag.                    |
| 6    | 729 (34)                                          | 706 (58)                                          | C-H wag.                    |

[a] Calculated at M06-2X-D3/def2-TZVP level of theory. [b] Argon matrix at 3 K. [c] Tentative assignment.

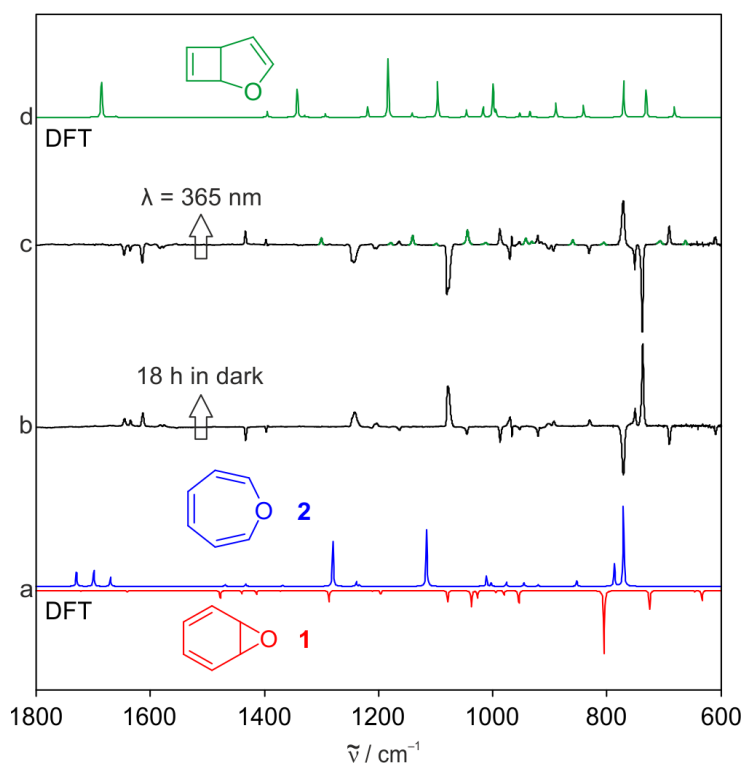

**Figure S1.** Heavy-atom tunneling and photochemical interconversion of valence tautomers of  $\text{C}_6\text{H}_6\text{O}$ . a) Theoretical IR spectra of **1** (pointing downwards) and **2** (pointing upwards). b) IR difference spectrum obtained after keeping an argon matrix containing **1** and **2** in the dark at 3 K for 18 h. c) IR difference spectrum obtained after irradiation of the matrix with  $\lambda = 365$  nm at 3 K for 30 min. Peaks highlighted in green are not affected by keeping the matrix in the dark. d) Theoretical IR spectrum of 2-oxabicyclo[3.2.0]hepta-3,6-diene. All calculations were performed at the M06-2X-D3/def2-TZVP level of theory.

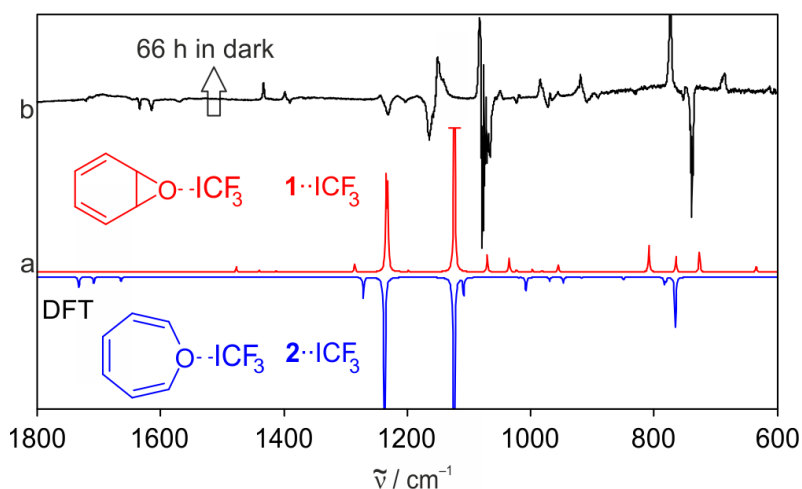

**Figure S2.** Heavy-atom tunneling in the interconversion of complexes  $1 \cdot \text{ICF}_3$  and  $2 \cdot \text{ICF}_3$ . a) Theoretical IR spectra of  $1 \cdot \text{ICF}_3$  (pointing downwards) and  $2 \cdot \text{ICF}_3$  (pointing upwards). For simplicity, the *exo*-complexes were chosen as representatives; the *endo*-complexes only exhibit marginal shifts in wavelength as seen in Tables S3+4. b) IR difference spectrum obtained after keeping an argon matrix containing  $1 \cdot \text{ICF}_3$  and  $2 \cdot \text{ICF}_3$  in the dark at 3 K for 66 h.

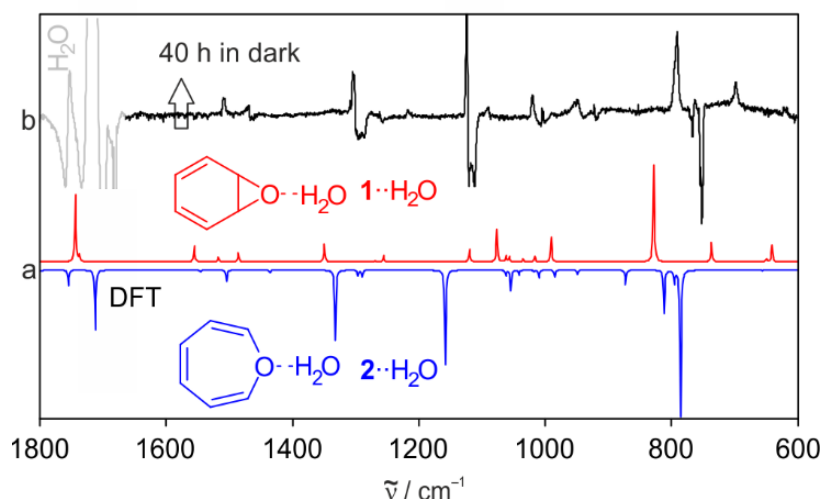

**Figure S3.** Heavy-atom tunneling in the interconversion of complexes  $1 \cdot \text{H}_2\text{O}$  and  $2 \cdot \text{H}_2\text{O}$ . a) Theoretical IR spectra of  $1 \cdot \text{H}_2\text{O}$  (pointing downwards) and  $2 \cdot \text{H}_2\text{O}$  (pointing upwards). For simplicity, the *endo-b* complexes were chosen as representatives; the *endo-a* and *exo*-complexes only exhibit marginal shifts in wavelength as seen in Tables S5+6. b) IR difference spectrum obtained after keeping an argon matrix containing  $1 \cdot \text{H}_2\text{O}$  and  $2 \cdot \text{H}_2\text{O}$  in the dark at 3 K for 40 h.

## Experimental kinetic data

### Methodology

In order to determine the rate constants, the decreasing intensity of the peak at  $772\text{ cm}^{-1}$  belonging to **1** and the increasing intensities at  $737$  and  $1078\text{ cm}^{-1}$  assigned to **2** were continuously monitored and fitted to Eq. 1. In case of  $\text{ICF}_3$  doped matrices, the integrated increasing peaks were  $686$  and  $773\text{ cm}^{-1}$  (assigned to  $1 \cdot \text{ICF}_3$ ) and the decreasing ones at  $1615$  and  $1634\text{ cm}^{-1}$  (assigned to  $2 \cdot \text{ICF}_3$ ). In the  $\text{H}_2\text{O}$  doped matrices the integrated peaks were two increasing at  $773$  and  $984\text{ cm}^{-1}$  (assigned to  $1 \cdot \text{H}_2\text{O}$ ) and a decreasing one at  $738\text{ cm}^{-1}$  (assigned to  $2 \cdot \text{H}_2\text{O}$ ). This equation<sup>[1]</sup> takes into account the presence of multiple matrix sites in the rigid argon matrix whose varying sizes and geometries result in a range of rate constants, represented by the dispersion coefficient  $\beta$ ; the addition of  $c$  allows for a simultaneous fit of increasing and decreasing peak intensities. By means of reverting the ring expansion of **1** to **2** via irradiation with  $\lambda = 365\text{ nm}$ , the kinetics of this reaction could be investigated in the same matrix at different temperatures.

$$I = I_0 \cdot e^{-(kt)^\beta} + c \quad \text{with } 0 < \beta < 1 \quad (\text{eq. 1})$$

Apparent half-lives ( $\tau_{\text{app}}$ ) can be calculated for these kinetics via Equation (2) though the high dispersivity of these kinetics mean that these “half-lives” have to be considered rough approximations.

$$\frac{\beta \sqrt{\ln 2}}{k} = \tau_{\text{app}} \quad (\text{eq. 2})$$

For the evaluation of the kinetics of the complexated molecules, the intensities of the corresponding peaks (with slight shifts in frequencies) were fitted. Kinetic measurements could be performed multiple times within the same matrix by reversion of the tunneling reaction via irradiation with  $\lambda = 254\text{ nm}$  or by additional complex formation via repeated annealing.

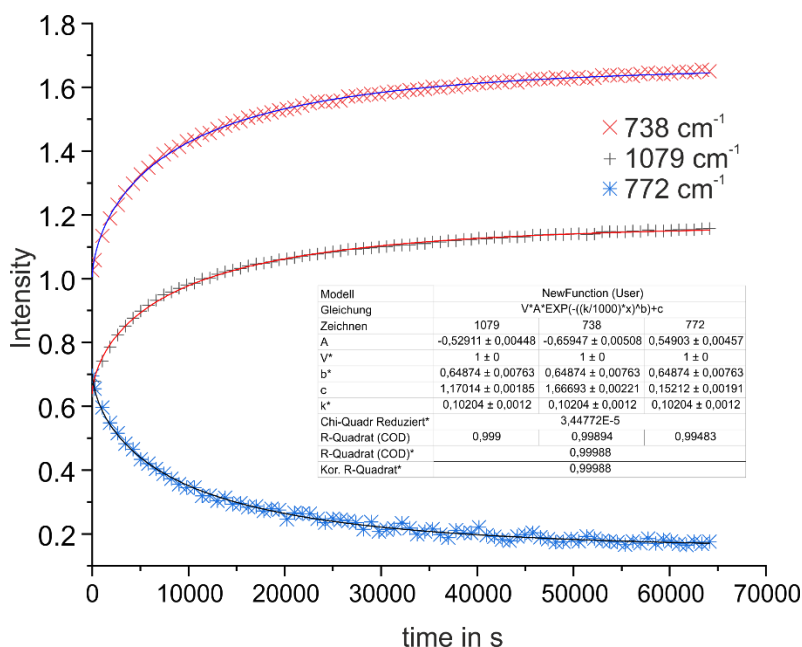

**Figure S3.** Exemplary plot of a simultaneous fit of the increasing intensities of the IR peaks at  $737$  and  $1078\text{ cm}^{-1}$  as well as the decreasing intensity of the IR peak at  $772\text{ cm}^{-1}$  to eq. 1 as recorded for an argon matrix at  $3\text{ K}$ .



**Table S4.** Rate constants  $k$  and (apparent) half-lives  $\tau_{\text{app}}$  as fitted to Equation (1) with  $\beta$  as a variable, for the ring expansion of benzene oxide (**1**) to oxepin (**2**) in an argon matrix. The duration of the experiment is given as  $t_{\text{final}}$ . Most measurements (for exceptions, s. notes) were performed using a filter with a cutoff of  $\tilde{\nu} > 2000 \text{ cm}^{-1}$ .

| T / K              | $k / 10^{-5} \text{ s}^{-1}$ | $\tau_{\text{app}} / \text{h}$ | $t_{\text{final}} / \text{h}$ | $\beta$ |
|--------------------|------------------------------|--------------------------------|-------------------------------|---------|
| 3 <sup>[a,b]</sup> | $5.6 \pm 1.2$                | 3.3                            | 17                            | 0.9     |
| 3 <sup>[a,b]</sup> | $5.1 \pm 0.1$                | 3.2                            | 72                            | 0.7     |
| 3                  | $4.7 \pm 0.2$                | 2.8                            | 23                            | 0.5     |
| 6                  | $2.4 \pm 0.3$                | 6.3                            | 25                            | 0.6     |
| 10                 | $2.7 \pm 0.6$                | 4.9                            | 21                            | 0.5     |
| 15                 | $1.4 \pm 0.4$                | 9.5                            | 21                            | 0.5     |
| 20                 | $2.0 \pm 0.2$                | 7.5                            | 25                            | 0.6     |
| 25                 | $1.0 \pm 0.4$                | 13.3                           | 26                            | 0.5     |

[a] Measurement was performed without using a filter. [b] Measurement was performed directly after deposition.

**Table S5.** Rate constants  $k$  and (apparent) half-lives  $\tau_{\text{app}}$  as fitted to Equation (1) with  $\beta = 0.6$ , for the ring expansion of benzene oxide (**1**) to oxepin (**2**) in an argon matrix. The duration of the experiment is given as  $t_{\text{final}}$ . Most measurements (for exceptions, s. notes) were performed using a filter with a cutoff of  $\tilde{\nu} > 2000 \text{ cm}^{-1}$ .

| T / K              | $k / 10^{-5} \text{ s}^{-1}$ | $\tau_{\text{app}} / \text{h}$ | $t_{\text{final}} / \text{h}$ |
|--------------------|------------------------------|--------------------------------|-------------------------------|
| 3 <sup>[a,b]</sup> | $3.5 \pm 1.9$                | 4.3                            | 17                            |
| 3 <sup>[a,b]</sup> | $5.9 \pm 0.2$                | 2.6                            | 72                            |
| 3                  | $5.4 \pm 0.2$                | 2.8                            | 23                            |
| 3 <sup>[c]</sup>   | $5.3 \pm 1.7$                | -                              | -                             |
| 6                  | $2.2 \pm 0.2$                | 6.9                            | 25                            |
| 10                 | $3.8 \pm 0.3$                | 4.0                            | 21                            |
| 15                 | $2.3 \pm 0.2$                | 6.6                            | 21                            |
| 20                 | $2.3 \pm 0.1$                | 6.6                            | 25                            |
| 25                 | $1.7 \pm 0.2$                | 8.9                            | 26                            |

[a] Measurement was performed without using a filter. [b]

Measurement was performed directly after deposition. [c]  
Weighted mean and standard error.

**Table S6.** Rate constants  $k$  and (apparent) half-lives  $\tau_{\text{app}}$  as fitted to Equation (1) with  $\beta$  as a variable, for the ring contraction of complexated oxepin ( $\mathbf{2}\cdot\text{ICF}_3$ ) to complexated benzene oxide ( $\mathbf{1}\cdot\text{ICF}_3$ ) in an argon matrix doped with 1% of  $\text{ICF}_3$ . The duration of the experiment is given as  $t_{\text{final}}$ . All measurements were performed using a filter with a cutoff of  $\tilde{\nu} > 2000 \text{ cm}^{-1}$ .

| T / K | $k / 10^{-5} \text{ s}^{-1}$ | $\tau_{\text{app}} / \text{h}$ | $t_{\text{final}} / \text{h}$ | $\beta$ |
|-------|------------------------------|--------------------------------|-------------------------------|---------|
| 3     | $4.0 \pm 0.1$                | 3.3                            | 66                            | 0.5     |
| 3     | $3.0 \pm 0.1$                | 4.4                            | 83                            | 0.5     |
| 3     | $2.4 \pm 0.1$                | 5.6                            | 42                            | 0.5     |

**Table S7.** Rate constants  $k$  and (apparent) half-lives  $\tau_{\text{app}}$  as fitted to Equation (1) with  $\beta = 0.5$ , for the ring contraction of complexated oxepin ( $\mathbf{2}\cdot\text{ICF}_3$ ) to complexated benzene oxide ( $\mathbf{1}\cdot\text{ICF}_3$ ) in an argon matrix doped with 1% of  $\text{ICF}_3$ . The duration of the experiment is given as  $t_{\text{final}}$ . All measurements were performed using a filter with a cutoff of  $\tilde{\nu} > 2000 \text{ cm}^{-1}$ .

| T / K            | $k / 10^{-5} \text{ s}^{-1}$ | $\tau_{\text{app}} / \text{h}$ | $t_{\text{final}} / \text{h}$ |
|------------------|------------------------------|--------------------------------|-------------------------------|
| 3                | $4.0 \pm 0.1$                | 3.3                            | 66                            |
| 3                | $3.0 \pm 0.1$                | 4.4                            | 83                            |
| 3                | $2.4 \pm 0.1$                | 5.6                            | 42                            |
| 3 <sup>[a]</sup> | $3.1 \pm 0.4$                | -                              | -                             |

[a] Weighted mean and standard error.

**Table S8.** Rate constants  $k$  and (apparent) half-lives  $\tau_{\text{app}}$  as fitted to Equation (1) with  $\beta$  as a variable, for the ring contraction of complexated oxepin ( $\mathbf{2}\cdot\text{H}_2\text{O}$ ) to complexated benzene oxide ( $\mathbf{1}\cdot\text{H}_2\text{O}$ ) in an argon matrix doped with 1% of  $\text{H}_2\text{O}$ . The duration of the experiment is given as  $t_{\text{final}}$ .

| T / K            | $k / 10^{-5} \text{ s}^{-1}$ | $\tau_{\text{app}} / \text{h}$ | $t_{\text{final}} / \text{h}$ | $\beta$ |
|------------------|------------------------------|--------------------------------|-------------------------------|---------|
| 3                | $5.3 \pm 0.1$                | 2.5                            | 43                            | 0.5     |
| 3                | $3.0 \pm 0.1$                | 4.4                            | 43                            | 0.5     |
| 3 <sup>[a]</sup> | $2.7 \pm 1.3$                | 4.9                            | 40                            | 0.5     |

[a] Measurement was performed using a filter with a cutoff of  $\tilde{\nu} > 2000 \text{ cm}^{-1}$ .

**Table S9.** Rate constants  $k$  and (apparent) half-lives  $\tau_{\text{app}}$  as fitted to Equation (1) with  $\beta = 0.5$ , for the ring contraction of complexated oxepin ( $\mathbf{2} \cdot \text{H}_2\text{O}$ ) to complexated benzene oxide ( $\mathbf{1} \cdot \text{H}_2\text{O}$ ) in an argon matrix doped with 1% of  $\text{H}_2\text{O}$ . The duration of the experiment is given as  $t_{\text{final}}$ .

| T / K            | $k / 10^{-5} \text{ s}^{-1}$ | $\tau_{\text{app}} / \text{h}$ | $t_{\text{final}} / \text{h}$ |
|------------------|------------------------------|--------------------------------|-------------------------------|
| 3                | $5.4 \pm 0.1$                | 2.5                            | 43                            |
| 3                | $3.0 \pm 0.1$                | 4.4                            | 43                            |
| 3 <sup>[a]</sup> | $2.6 \pm 1.1$                | 5.1                            | 40                            |
| 3 <sup>[b]</sup> | $4.2 \pm 1.2$                | -                              | -                             |

[a] Measurement was performed using a filter with a cutoff of  $\tilde{\nu} > 2000 \text{ cm}^{-1}$ . [b] Weighted mean and standard error.

## Determination of equilibrium data

### Methodology of measurements/analyses

*Determining the ratio of 1/2:* The IR intensities measured at any given time can be normalized under the use of the difference spectrum presented in Figure S1, signifying the conversion of one equivalent of benzene oxide ( $\mathbf{1}$ ) to one equivalent of oxepin ( $\mathbf{2}$ ). The intensity ratios of the peak at  $772 \text{ cm}^{-1}$  (belonging to  $\mathbf{1}$ ) and of the peaks at  $737$  and  $1078 \text{ cm}^{-1}$  (assigned to  $\mathbf{2}$ ) could thus be analysed and averaged to obtain the ratio of  $\mathbf{1/2}$ .

*Determining  $\Delta G$ :* Though the sample was cooled to  $-40^\circ\text{C}$ , the ratio determined upon deposition is assumed to be representative of the gas phase equilibrium at room temperature due to thermal equilibration with the deposition equipment on its way to the cold window. If the ratio is instead assumed to be representative of the gas phase equilibrium at  $-40^\circ$ , a value of  $\Delta G^{233 \text{ K}} = -1.17 \text{ kcal mol}^{-1}$  results. As a sidenote, both values represent the lower limit for  $\Delta G$  since tunneling during the deposition (approx. 10 minutes) cannot be accounted for, resulting in an underestimation of the ratio  $\mathbf{1/2}$  and thus an increased  $\Delta G$ .

*Determining  $\Delta E$ :* After deposition, the sample was left in the IR spectrometer without filter for approx. 70 h, in order to measure kinetics. To ensure that the equilibrium was not influenced by IR irradiation, the sample was then removed from the spectrometer and kept in the dark, apart from the final IR measurement (duration  $< 10$  minutes). Due to the kinetics' high dispersivity it is doubtful whether the ratio determined from the long-term experiment actually represents the  $\Delta E^{0 \text{ K}}$  as the reaction might not fully proceed in solid argon (making  $\Delta E$  an upper limit). However, the ratio determined via the IR intensities at the "end" of the reaction agrees well with the ratio obtained via the constant  $c$  in eq. 1, signifying the extrapolated intensities at "infinite" times.

## Calculated complexes

### General methodology for quantumchemical calculations

All gas-phase DFT geometry optimizations and frequency calculations were carried out using the M06-2X functional<sup>[2]</sup> and the D3 dispersion correction,<sup>[3]</sup> while employing the def2-TZVP basis set.<sup>[4]</sup> DFT and CCSD(T) calculations were performed with the programs Gaussian 09<sup>[5]</sup> and Molpro 2012,<sup>[6]</sup> respectively.

### Methodology for systematic calculation of complexes

To investigate the energetics of the respective 1 : 1 complexes between BrCF<sub>3</sub>, ICF<sub>3</sub> or H<sub>2</sub>O and benzene oxide (**1**) or oxepin (**2**), 100 randomly assembled geometries were systematically calculated via the multiple minima hypersurface (MMH) procedure<sup>[7]</sup> (box size = 6 Å) at the M06-2X-d3/def2-TZVP level of theory. The respective most energetically stable complexes found by this methodology (with a cutoff of  $\Delta E < 1.5$  kcal mol<sup>-1</sup> with regards to the most stable one) are depicted below.

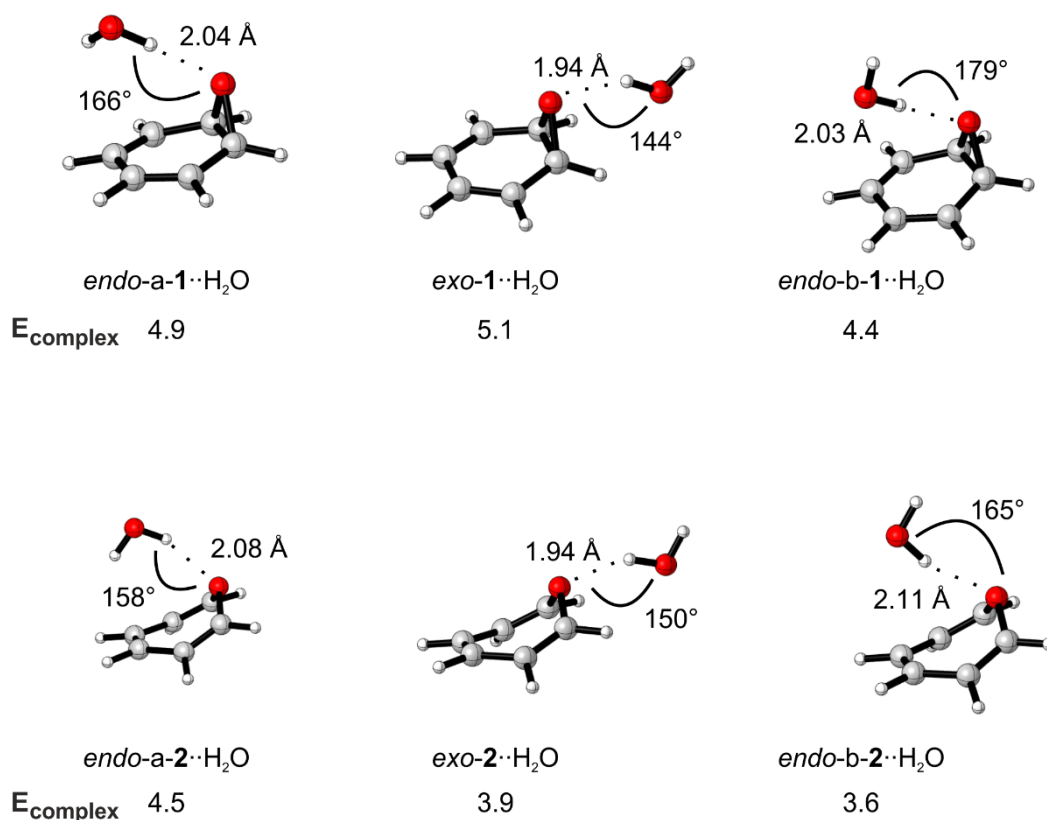

**Figure S3.** All complexes of **1** and **2** with H<sub>2</sub>O found by the MMH procedure and subsequent optimization at the M06-2X-d3/def2-TZVP level of theory.

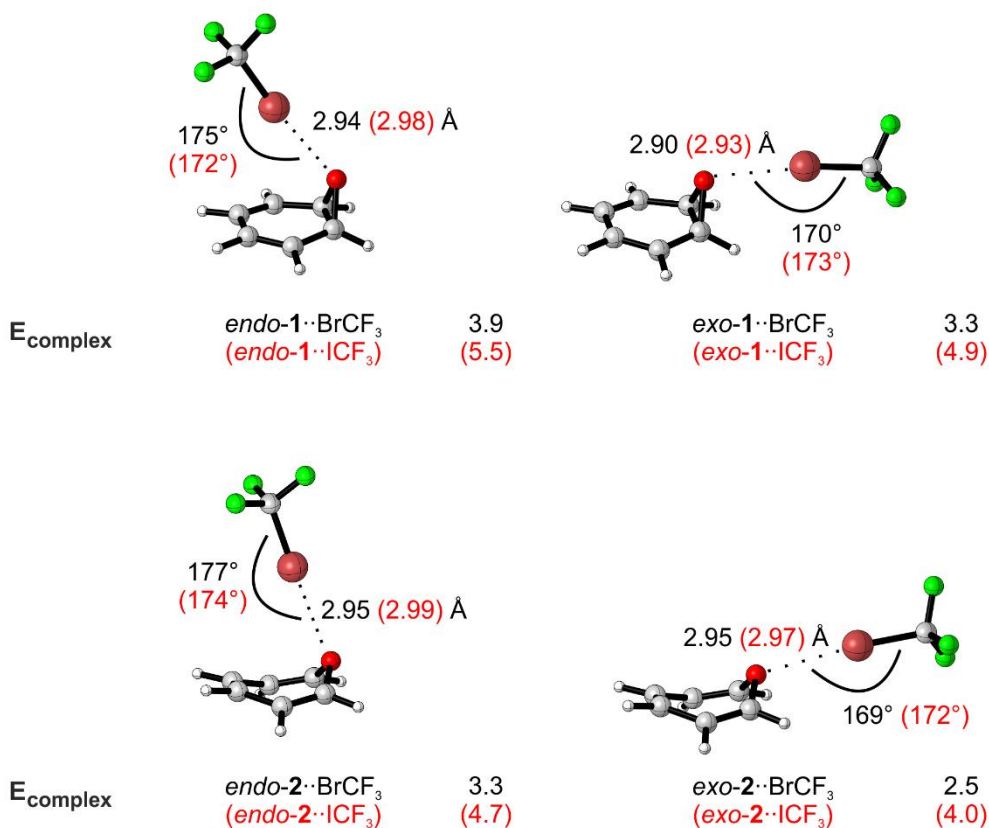

**Figure S4.** All complexes of **1** and **2** with BrCF<sub>3</sub> and ICF<sub>3</sub> found by the MMH procedure and subsequent optimization at the M06-2X-d3/def2-TZVP level of theory.

## Synthesis

All synthetic procedures were taken from literature,<sup>[8]</sup> with the obtained NMR data for the products matching the ones reported previously.

### 1,2-Epoxy-cyclohex-4-ene

To a solution of 2.3 mL (2.0 g, 25.0 mmol) of 1,4-cyclohexadiene in 40 mL of DCM was added a suspension of 6.0 g ( $\approx$  24 - 26 mmol) of mCPBA in 20 mL of DCM in one portion at 0°C. After stirring at rt for 5 h, the reaction mixture was filtered and the solid washed with 4 x 5 mL of DCM. The combined organic extracts were washed with 2 x 25 mL of sat. aq. Na<sub>2</sub>SO<sub>3</sub> (peroxide test negative), 50 mL of sat. NaHCO<sub>3</sub> (pH ~ neutral) and 50 mL of sat. aq. NaCl. Drying over Na<sub>2</sub>SO<sub>4</sub>, filtration and evaporation of the solvent resulted in 1.4 g (14.2 mmol, 58% yield) of 1,2-epoxy-cyclohex-4-ene as colourless liquid.

<sup>1</sup>H-NMR (200 MHz, CDCl<sub>3</sub>):  $\delta$  = 5.44 ("p",  $J$  = 1.2 Hz, 2H), 3.24 (dq,  $J$  = 2.1, 1.1 Hz, 2H), 2.72 – 2.25 (m, 4H) ppm.

### 1,2-Epoxy-4,5-dibromocyclohexane

A solution of 0.75 mL of Br<sub>2</sub> (2.34 g, 14.6 mmol) in 5 mL of DCM/CHCl<sub>3</sub> (1:1, v/v) was added dropwise to a solution of 1.35 g (14.0 mmol) of 1,4-cyclohexene oxide in 30 mL of DCM/CHCl<sub>3</sub> (1:1, v/v) at -70°C, at such a rate that the reaction mixture remained (pale) yellow; when the colour changed to dark orange, the addition of the bromine solution was stopped. The reaction mixture was stirred at -70°C for 30 min, then allowed to warm to rt. 15 mL of sat. aq. Na<sub>2</sub>S<sub>2</sub>O<sub>4</sub> were added and the aqueous layer was extracted with 3 x 15 mL of DCM. Drying over Na<sub>2</sub>SO<sub>4</sub>, filtration and evaporation of the solvent resulted in 3.30 g (12.9 mmol, 92% yield) of 1,2-epoxy-4,5-dibromocyclohexane as colourless crystalline solid.

<sup>1</sup>H-NMR (300 MHz, CDCl<sub>3</sub>): δ = 4.30 (ddd, *J* = 7.7, 6.6, 4.6 Hz, 1H), 4.26 – 4.13 (m, 1H), 3.27 – 3.21 (m, 2H), 3.00 (ddt, *J* = 16.1, 4.6, 1.1 Hz, 1H), 2.90 (ddd, *J* = 16.5, 6.3, 3.5 Hz, 1H), 2.65 (br dd, *J* = 16.5, 6.3 Hz, 1H), 2.46 (dddd, *J* = 16.0, 6.7, 3.5, 0.7 Hz, 1H, ) ppm.

### Benzene oxide/oxepin (1/2)

1.15 g (4.5 mmol) of epoxy-4,5-dibromocyclohexane were dissolved in 25 mL of dry ether and cooled to 0°C before addition of 1.0 g (8.9 mmol) of KO<sup>t</sup>Bu in four portions over the course of one hour. After stirring for 1.5 h at rt, the reaction mixture was poured into 50 mL of H<sub>2</sub>O. After addition of 25 mL of ether, the organic solution was washed with 25 mL of H<sub>2</sub>O, 50 mL of sat. NaHCO<sub>3</sub> and 50 mL of sat. aq. NaCl. Drying over MgSO<sub>4</sub>, filtration and evaporation of the solvent resulted in 0.32 g (3.4 mmol, 76% yield) of oxepin/benzene oxide as yellow liquid.

<sup>1</sup>H-NMR (200 MHz, CDCl<sub>3</sub>): δ = 6.26 (ddt, *J* = 4.7, 2.8, 0.7 Hz, 2H), 5.93 (tdd, *J* = 4.9, 2.5, 1.1 Hz, 2H), 5.12 (dt, *J* = 4.8, 0.8 Hz, 2H) ppm.

## Z-Matrices

|                                                                                                                                                                            |   |               |               |               |
|----------------------------------------------------------------------------------------------------------------------------------------------------------------------------|---|---------------|---------------|---------------|
| 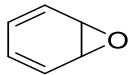 <p style="text-align: center;"><b>1</b></p> <p>CCSD(T)/def2-TZVP<br/>E = -306.752497</p> | C | -0.1131564249 | 1.4400241344  | 0.7278681012  |
|                                                                                                                                                                            | C | -0.1131564249 | 1.4400241344  | -0.7278681012 |
|                                                                                                                                                                            | C | 0.1832239040  | 0.3238595239  | -1.4337332516 |
|                                                                                                                                                                            | C | 0.1832239040  | 0.3238595239  | 1.4337332516  |
|                                                                                                                                                                            | C | 0.3254735785  | -0.9738534711 | -0.7523447909 |
|                                                                                                                                                                            | C | 0.3254735785  | -0.9738534711 | 0.7523447909  |
|                                                                                                                                                                            | H | -0.2553110450 | 2.3858418663  | 1.2426570853  |
|                                                                                                                                                                            | H | -0.2553110450 | 2.3858418663  | -1.2426570853 |
|                                                                                                                                                                            | H | 0.3273862551  | 0.3643794566  | -2.5094440715 |
|                                                                                                                                                                            | H | 0.3273862551  | 0.3643794566  | 2.5094440715  |
|                                                                                                                                                                            | H | 0.8465956811  | -1.7720993036 | -1.2767828251 |
|                                                                                                                                                                            | H | 0.8465956811  | -1.7720993036 | 1.2767828251  |
|                                                                                                                                                                            | O | -0.8076522377 | -1.4355521431 | 0.0000000000  |

|                                                                                                                                                                              |   |               |               |               |
|------------------------------------------------------------------------------------------------------------------------------------------------------------------------------|---|---------------|---------------|---------------|
| 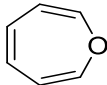 <p style="text-align: center;"><b>2</b></p> <p>CCSD(T)/def2-TZVP<br/>E = -306.753909</p> | C | -0.1541108256 | -1.4344247291 | -0.6775542635 |
|                                                                                                                                                                              | C | -0.1541108256 | -1.4344247291 | 0.6775542635  |
|                                                                                                                                                                              | C | 0.2604610137  | -0.3014526937 | 1.4973778712  |
|                                                                                                                                                                              | C | 0.2604610137  | -0.3014526937 | -1.4973778712 |
|                                                                                                                                                                              | C | 0.1216327708  | 0.9872565427  | 1.1461994166  |
|                                                                                                                                                                              | C | 0.1216327708  | 0.9872565427  | -1.1461994166 |
|                                                                                                                                                                              | H | -0.4017093922 | -2.3567488688 | -1.1974565657 |
|                                                                                                                                                                              | H | -0.4017093922 | -2.3567488688 | 1.1974565657  |
|                                                                                                                                                                              | H | 0.7263483515  | -0.5027153355 | 2.4585813725  |
|                                                                                                                                                                              | H | 0.7263483515  | -0.5027153355 | -2.4585813725 |
|                                                                                                                                                                              | H | 0.4754487914  | 1.8121853752  | 1.7596235924  |
|                                                                                                                                                                              | H | 0.4754487914  | 1.8121853752  | -1.7596235924 |
|                                                                                                                                                                              | O | -0.5534251689 | 1.3906371782  | 0.0000000000  |

|                                                                                                                             |   |             |             |             |
|-----------------------------------------------------------------------------------------------------------------------------|---|-------------|-------------|-------------|
| 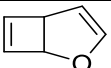<br>M06-2X-D3/def2-TZVP<br>E = -307.258707 | C | 0.95770900  | 1.15067700  | -0.06794200 |
|                                                                                                                             | C | 1.58753300  | 0.02246200  | -0.37608600 |
|                                                                                                                             | O | 0.96806000  | -1.13191600 | 0.00223500  |
|                                                                                                                             | H | 1.32420400  | 2.14225900  | -0.27715900 |
|                                                                                                                             | H | 2.53040600  | -0.11963000 | -0.88386500 |
|                                                                                                                             | C | -0.29418400 | -0.75731500 | 0.56594800  |
|                                                                                                                             | H | -0.43993100 | -1.30683700 | 1.49451200  |
|                                                                                                                             | C | -0.34710700 | 0.80926200  | 0.59632300  |
|                                                                                                                             | H | -0.52454000 | 1.30757700  | 1.55042300  |
|                                                                                                                             | C | -1.44648400 | -0.68401400 | -0.40329800 |
|                                                                                                                             | H | -1.97671900 | -1.44795900 | -0.95577200 |
|                                                                                                                             | C | -1.53515600 | 0.64408700  | -0.33862400 |
|                                                                                                                             | H | -2.19177300 | 1.36896200  | -0.80393700 |

|                                                            |   |             |             |             |
|------------------------------------------------------------|---|-------------|-------------|-------------|
| ICF <sub>3</sub><br>M06-2X-D3/def2-TZVP<br>E = -635.281973 | C | 0.00000000  | 0.00000000  | -1.17383900 |
|                                                            | I | 0.00000000  | 0.00000000  | 0.96712400  |
|                                                            | F | 0.00000000  | 1.23929700  | -1.63757500 |
|                                                            | F | 1.07326300  | -0.61964900 | -1.63757500 |
|                                                            | F | -1.07326300 | -0.61964900 | -1.63757500 |

|                                                                                                                                                                   |   |            |             |             |
|-------------------------------------------------------------------------------------------------------------------------------------------------------------------|---|------------|-------------|-------------|
| 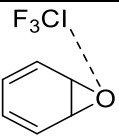<br><i>endo</i> -1••ICF <sub>3</sub><br>M06-2X-D3/def2-TZVP<br>E = -942.571799 | C | 2.59211400 | 1.55148800  | 0.70773800  |
|                                                                                                                                                                   | C | 2.60332400 | 1.53029200  | -0.74209100 |
|                                                                                                                                                                   | C | 2.98310500 | 0.43963400  | -1.42462400 |
|                                                                                                                                                                   | C | 2.96017600 | 0.48118400  | 1.42775200  |
|                                                                                                                                                                   | H | 2.38480300 | 2.49126300  | 1.20340100  |
|                                                                                                                                                                   | H | 2.40295600 | 2.45495500  | -1.26804800 |
|                                                                                                                                                                   | H | 3.15594400 | 0.48014000  | -2.49218900 |
|                                                                                                                                                                   | H | 3.11593700 | 0.55313400  | 2.49634500  |
|                                                                                                                                                                   | C | 3.17955800 | -0.81252100 | 0.77657500  |
|                                                                                                                                                                   | H | 3.73223400 | -1.57493700 | 1.31304300  |



|   |             |             |             |
|---|-------------|-------------|-------------|
| C | 3.19236100  | -0.83434200 | -0.73238600 |
| H | 3.75377600  | -1.61165700 | -1.23754800 |
| O | 2.09821900  | -1.33833000 | 0.02035500  |
| I | -0.68519600 | -0.28642000 | -0.01047900 |
| C | -2.77187900 | 0.18518300  | 0.00554300  |
| F | -3.18765800 | 0.46840900  | 1.23600900  |
| F | -3.49626300 | -0.83407600 | -0.44329500 |
| F | -3.03258700 | 1.23772100  | -0.76310200 |

|                                                                                                                                                                   |   |             |             |             |
|-------------------------------------------------------------------------------------------------------------------------------------------------------------------|---|-------------|-------------|-------------|
| 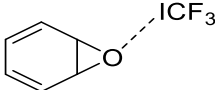 <p>exo-1••ICF<sub>3</sub></p> <p>M06-2X-D3/def2-TZVP</p> <p>E = -942.570870</p> | C | -4.81372600 | -0.66816900 | -0.13094900 |
|                                                                                                                                                                   | C | -4.76428300 | 0.78089000  | -0.15257300 |
|                                                                                                                                                                   | C | -3.67112600 | 1.45141000  | 0.23914700  |
|                                                                                                                                                                   | C | -3.76852600 | -1.40034900 | 0.28121300  |
|                                                                                                                                                                   | C | -2.41902500 | 0.73839200  | 0.50338300  |
|                                                                                                                                                                   | C | -2.46996900 | -0.76777700 | 0.52534300  |
|                                                                                                                                                                   | H | -5.75869700 | -1.15038200 | -0.34669700 |
|                                                                                                                                                                   | H | -5.67414700 | 1.31977000  | -0.38423200 |
|                                                                                                                                                                   | H | -3.69445400 | 2.52316000  | 0.38729800  |
|                                                                                                                                                                   | H | -3.86591500 | -2.46325500 | 0.46011000  |
|                                                                                                                                                                   | H | -1.64860100 | 1.23951900  | 1.08012000  |
|                                                                                                                                                                   | H | -1.73489800 | -1.30276700 | 1.11744900  |
|                                                                                                                                                                   | O | -1.89902400 | -0.04896800 | -0.56031800 |
|                                                                                                                                                                   | C | 3.10752600  | 0.03113200  | 0.19141500  |
|                                                                                                                                                                   | F | 3.38558500  | -0.72970900 | 1.24353600  |
|                                                                                                                                                                   | F | 3.48897900  | 1.27188100  | 0.47180200  |
|                                                                                                                                                                   | F | 3.83675100  | -0.40064200 | -0.82979600 |
|                                                                                                                                                                   | I | 1.01814800  | -0.03851400 | -0.27440100 |

|                                                                                                                                                                           |            |             |             |             |
|---------------------------------------------------------------------------------------------------------------------------------------------------------------------------|------------|-------------|-------------|-------------|
| 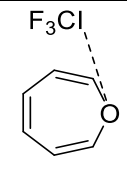 <p><i>endo-2</i>••ICF<sub>3</sub></p> <p>M06-2X-D3/def2-TZVP</p> <p>E = -942.570614</p> | C          | -2.77958100 | 1.53651600  | -0.61269700 |
|                                                                                                                                                                           | C          | -2.78074300 | 1.48008300  | 0.73000200  |
|                                                                                                                                                                           | C          | -3.09601000 | 0.29151900  | 1.50416700  |
|                                                                                                                                                                           | C          | -3.09270500 | 0.41689200  | -1.48425900 |
|                                                                                                                                                                           | C          | -2.85339500 | -0.95337300 | 1.10339300  |
|                                                                                                                                                                           | C          | -2.84951600 | -0.85687600 | -1.18907200 |
|                                                                                                                                                                           | H          | -2.61389300 | 2.49604600  | -1.08834500 |
|                                                                                                                                                                           | H          | -2.61495100 | 2.39632200  | 1.28437700  |
|                                                                                                                                                                           | H          | -3.57241100 | 0.41716500  | 2.46888500  |
|                                                                                                                                                                           | H          | -3.56783100 | 0.62200600  | -2.43583900 |
|                                                                                                                                                                           | H          | -3.13368300 | -1.83551600 | 1.66583500  |
|                                                                                                                                                                           | H          | -3.12820700 | -1.68916300 | -1.82364100 |
|                                                                                                                                                                           | O          | -2.14255400 | -1.22884800 | -0.05527000 |
|                                                                                                                                                                           | I          | 0.68614500  | -0.25896000 | 0.00064100  |
|                                                                                                                                                                           | C          | 2.77417600  | 0.20789400  | 0.00132300  |
|                                                                                                                                                                           | F          | 3.49127500  | -0.81621300 | 0.44939800  |
|                                                                                                                                                                           | F          | 3.03067300  | 1.25483000  | 0.77750300  |
| F                                                                                                                                                                         | 3.19720200 | 0.49614500  | -1.22470600 |             |

|                                                                                                                                                                            |   |             |             |             |
|----------------------------------------------------------------------------------------------------------------------------------------------------------------------------|---|-------------|-------------|-------------|
| 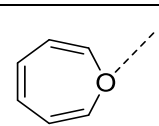 <p><i>exo-2</i>••ICF<sub>3</sub></p> <p>M06-2X-D3/def2-TZVP</p> <p>E = -942.569565</p> | C | -4.78828200 | -0.62942100 | -0.27302500 |
|                                                                                                                                                                            | C | -4.75511800 | 0.71362700  | -0.27693500 |
|                                                                                                                                                                            | C | -3.68852700 | 1.51097300  | 0.30439400  |
|                                                                                                                                                                            | C | -3.76226800 | -1.47536800 | 0.31304800  |
|                                                                                                                                                                            | C | -2.41601400 | 1.13167300  | 0.36880500  |
|                                                                                                                                                                            | C | -2.47256400 | -1.15897000 | 0.37580800  |
|                                                                                                                                                                            | H | -5.67470200 | -1.12497200 | -0.65133000 |
|                                                                                                                                                                            | H | -5.61624900 | 1.25018400  | -0.65788400 |
|                                                                                                                                                                            | H | -3.93970200 | 2.47418700  | 0.73158900  |
|                                                                                                                                                                            | H | -4.06152600 | -2.42220300 | 0.74594300  |
|                                                                                                                                                                            | H | -1.63545500 | 1.70756200  | 0.85299400  |

|  |   |             |             |             |
|--|---|-------------|-------------|-------------|
|  | H | -1.72152600 | -1.77003100 | 0.86351200  |
|  | O | -1.96122800 | -0.02744600 | -0.24304600 |
|  | C | 3.13145200  | 0.01997300  | 0.11602500  |
|  | F | 3.46234900  | -0.66496200 | 1.20328500  |
|  | F | 3.55724700  | 1.26728200  | 0.27090300  |
|  | F | 3.77559000  | -0.50967300 | -0.91535200 |
|  | I | 1.01302300  | -0.02648900 | -0.19884300 |

|                                                                  |    |             |             |             |
|------------------------------------------------------------------|----|-------------|-------------|-------------|
| BrCF <sub>3</sub><br><br>M06-2X-D3/def2-TZVP<br>E = -2911.848378 | C  | 0.00000000  | 0.00000000  | -0.81211200 |
|                                                                  | F  | 0.00000000  | 1.23879600  | -1.26912400 |
|                                                                  | F  | 1.07282900  | -0.61939800 | -1.26912400 |
|                                                                  | F  | -1.07282900 | -0.61939800 | -1.26912400 |
|                                                                  | Br | 0.00000000  | 0.00000000  | 1.11825800  |

|                                                                                                                                                                     |   |             |             |             |
|---------------------------------------------------------------------------------------------------------------------------------------------------------------------|---|-------------|-------------|-------------|
| 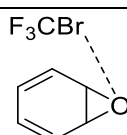<br><i>endo-1</i> ••BrCF <sub>3</sub><br>M06-2X-D3/def2-TZVP<br>E = -3219.135756 | C | 2.29100000  | 1.52132100  | 0.71577500  |
|                                                                                                                                                                     | C | 2.32247400  | 1.51091700  | -0.73347700 |
|                                                                                                                                                                     | C | 2.75903600  | 0.44268500  | -1.41778000 |
|                                                                                                                                                                     | C | 2.69683400  | 0.46320700  | 1.43362300  |
|                                                                                                                                                                     | H | 2.03634900  | 2.44747900  | 1.21510500  |
|                                                                                                                                                                     | H | 2.08972500  | 2.42964100  | -1.25661500 |
|                                                                                                                                                                     | H | 2.94517200  | 0.49959700  | -2.48247200 |
|                                                                                                                                                                     | H | 2.83594400  | 0.53536200  | 2.50462200  |
|                                                                                                                                                                     | C | 2.98328900  | -0.81513400 | 0.77751400  |
|                                                                                                                                                                     | H | 3.56729900  | -1.55242800 | 1.31640000  |
|                                                                                                                                                                     | C | 3.01667600  | -0.82588300 | -0.73153200 |
|                                                                                                                                                                     | H | 3.62398900  | -1.57040700 | -1.23350000 |
|                                                                                                                                                                     | O | 1.93990100  | -1.38525700 | 0.00350900  |
|                                                                                                                                                                     | C | -2.67241700 | 0.13041400  | 0.00196300  |
|                                                                                                                                                                     | F | -3.05031700 | 0.48265400  | 1.22261200  |

|  |    |             |             |             |
|--|----|-------------|-------------|-------------|
|  | F  | -3.43885600 | -0.87472300 | -0.39400200 |
|  | F  | -2.88690900 | 1.15702000  | -0.80869700 |
|  | Br | -0.81755200 | -0.37591200 | -0.01563800 |

|                                                                                                                                                                            |            |             |             |             |
|----------------------------------------------------------------------------------------------------------------------------------------------------------------------------|------------|-------------|-------------|-------------|
| 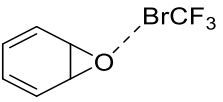 <p><i>exo</i>-1••BrCF<sub>3</sub></p> <p>M06-2X-D3/def2-TZVP</p> <p>E = -3219.134683</p> | C          | -4.52713800 | -0.71400800 | -0.06463900 |
|                                                                                                                                                                            | C          | -4.51780800 | 0.73566200  | -0.07109900 |
|                                                                                                                                                                            | C          | -3.41651000 | 1.43150500  | 0.24741600  |
|                                                                                                                                                                            | C          | -3.43500100 | -1.42130500 | 0.26021500  |
|                                                                                                                                                                            | C          | -2.12869400 | 0.75177500  | 0.40410600  |
|                                                                                                                                                                            | C          | -2.13839300 | -0.75711700 | 0.41095000  |
|                                                                                                                                                                            | H          | -5.47313000 | -1.21873400 | -0.21450900 |
|                                                                                                                                                                            | H          | -5.45721100 | 1.25122100  | -0.22532200 |
|                                                                                                                                                                            | H          | -3.45874600 | 2.50006300  | 0.41409300  |
|                                                                                                                                                                            | H          | -3.49133900 | -2.48774500 | 0.43607500  |
|                                                                                                                                                                            | H          | -1.33066500 | 1.26653500  | 0.92873500  |
|                                                                                                                                                                            | H          | -1.34683700 | -1.27723300 | 0.94014200  |
|                                                                                                                                                                            | O          | -1.67217500 | -0.01068600 | -0.70235200 |
|                                                                                                                                                                            | C          | 3.05161900  | 0.00638900  | 0.17538800  |
|                                                                                                                                                                            | F          | 3.24232800  | -0.82399700 | 1.18907800  |
|                                                                                                                                                                            | F          | 3.40806400  | 1.22181400  | 0.56054300  |
| F                                                                                                                                                                          | 3.83964700 | -0.36394800 | -0.82033400 |             |
| Br                                                                                                                                                                         | 1.20561500 | -0.01288200 | -0.37708600 |             |

|                                                                                                                                                                               |   |             |             |             |
|-------------------------------------------------------------------------------------------------------------------------------------------------------------------------------|---|-------------|-------------|-------------|
| 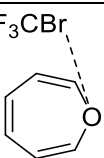 <p><i>endo</i>-2••BrCF<sub>3</sub></p> <p>M06-2X-D3/def2-TZVP</p> <p>E = -3219.134865</p> | C | -2.47209000 | 1.52114500  | -0.62388400 |
|                                                                                                                                                                               | C | -2.47766800 | 1.47547100  | 0.71845800  |
|                                                                                                                                                                               | C | -2.85005700 | 0.30878700  | 1.50131400  |
|                                                                                                                                                                               | C | -2.83739800 | 0.41034900  | -1.48720300 |
|                                                                                                                                                                               | C | -2.67070800 | -0.95017500 | 1.11118000  |
|                                                                                                                                                                               | C | -2.66037900 | -0.87210200 | -1.18226200 |
|                                                                                                                                                                               | H | -2.25810500 | 2.46701300  | -1.10765400 |

|    |             |             |             |
|----|-------------|-------------|-------------|
| H  | -2.26663300 | 2.38615200  | 1.26670300  |
| H  | -3.31852600 | 0.46470600  | 2.46554700  |
| H  | -3.29827900 | 0.63124100  | -2.44231400 |
| H  | -2.99385000 | -1.80957300 | 1.68637300  |
| H  | -2.97844900 | -1.69055900 | -1.81681800 |
| O  | -1.98192100 | -1.27868800 | -0.04489600 |
| C  | 2.66862000  | 0.16275800  | 0.00100800  |
| F  | 3.43559200  | -0.84166700 | 0.39669000  |
| F  | 2.87066000  | 1.18470300  | 0.81944400  |
| F  | 3.05224800  | 0.52342900  | -1.21463400 |
| Br | 0.81545100  | -0.35300100 | 0.00177600  |

|                                                                                                                                                                             |    |             |             |             |
|-----------------------------------------------------------------------------------------------------------------------------------------------------------------------------|----|-------------|-------------|-------------|
| 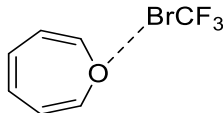 <p><i>exo</i>-2••BrCF<sub>3</sub></p> <p>M06-2X-D3/def2-TZVP</p> <p>E = -3219.133757</p> | C  | -4.53740200 | -0.65335700 | -0.06378500 |
|                                                                                                                                                                             | C  | -4.52316500 | 0.68955000  | -0.06981200 |
|                                                                                                                                                                             | C  | -3.38140900 | 1.50084800  | 0.31822700  |
|                                                                                                                                                                             | C  | -3.41309100 | -1.48520700 | 0.33182600  |
|                                                                                                                                                                             | C  | -2.11122600 | 1.13907700  | 0.16341800  |
|                                                                                                                                                                             | C  | -2.13553200 | -1.15198800 | 0.17388000  |
|                                                                                                                                                                             | H  | -5.46841200 | -1.16155400 | -0.28614800 |
|                                                                                                                                                                             | H  | -5.44319100 | 1.21529000  | -0.29702600 |
|                                                                                                                                                                             | H  | -3.56682000 | 2.46298400  | 0.78019600  |
|                                                                                                                                                                             | H  | -3.61903600 | -2.43881200 | 0.80261500  |
|                                                                                                                                                                             | H  | -1.27091700 | 1.73399100  | 0.50352900  |
|                                                                                                                                                                             | H  | -1.30798100 | -1.76129000 | 0.51973100  |
|                                                                                                                                                                             | O  | -1.74304400 | -0.01360500 | -0.51136600 |
|                                                                                                                                                                             | C  | 3.06411300  | 0.00872900  | 0.16263300  |
|                                                                                                                                                                             | F  | 3.28243100  | -0.80546400 | 1.18242200  |
|                                                                                                                                                                             | F  | 3.42896600  | 1.23014800  | 0.51696500  |
|                                                                                                                                                                             | F  | 3.82120500  | -0.37750800 | -0.85006000 |
|                                                                                                                                                                             | Br | 1.20153000  | -0.01863600 | -0.33355000 |

|                     |   |            |             |             |
|---------------------|---|------------|-------------|-------------|
| H <sub>2</sub> O    | O | 0.00000000 | 0.00000000  | 0.11619900  |
| M06-2X-D3/def2-TZVP | H | 0.00000000 | 0.76434100  | -0.46479500 |
| E = -76.404569      | H | 0.00000000 | -0.76434100 | -0.46479500 |

|                                                                                                                                                                             |   |             |             |             |
|-----------------------------------------------------------------------------------------------------------------------------------------------------------------------------|---|-------------|-------------|-------------|
| 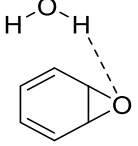 <p><i>endo-a-1••H<sub>2</sub>O</i></p> <p>M06-2X-D3/def2-TZVP</p> <p>E = -3219.135756</p> | C | 0.29756400  | 1.31417100  | -0.82107400 |
|                                                                                                                                                                             | C | -0.05595200 | 1.52832400  | 0.56856000  |
|                                                                                                                                                                             | C | -0.89868800 | 0.70639400  | 1.21067900  |
|                                                                                                                                                                             | C | -0.19194100 | 0.27813400  | -1.51985300 |
|                                                                                                                                                                             | C | -1.31933300 | -0.55621800 | 0.59723500  |
|                                                                                                                                                                             | C | -0.94066200 | -0.78638800 | -0.84468900 |
|                                                                                                                                                                             | H | 0.87810900  | 2.07845400  | -1.32306400 |
|                                                                                                                                                                             | H | 0.29221100  | 2.43239500  | 1.05082500  |
|                                                                                                                                                                             | H | -1.29193700 | 0.96089800  | 2.18628500  |
|                                                                                                                                                                             | H | -0.06804200 | 0.21946900  | -2.59370200 |
|                                                                                                                                                                             | H | -2.19681100 | -1.05591500 | 0.99098400  |
|                                                                                                                                                                             | H | -1.55645300 | -1.44401400 | -1.44700900 |
|                                                                                                                                                                             | O | -0.28667300 | -1.45663700 | 0.22248200  |
|                                                                                                                                                                             | O | 2.57759600  | -0.66141000 | 0.49848200  |
|                                                                                                                                                                             | H | 2.60688500  | -0.18648700 | -0.33557100 |
|                                                                                                                                                                             | H | 1.66272600  | -0.96692800 | 0.55839700  |

|                                                                                                                                                                              |   |             |             |             |
|------------------------------------------------------------------------------------------------------------------------------------------------------------------------------|---|-------------|-------------|-------------|
| 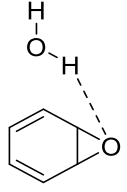 <p><i>endo-b-1••H<sub>2</sub>O</i></p> <p>M06-2X-D3/def2-TZVP</p> <p>E = -383.692658</p> | C | -0.21625700 | 1.38145500  | 0.75481700  |
|                                                                                                                                                                              | C | -0.15649500 | 1.43224700  | -0.69289800 |
|                                                                                                                                                                              | C | 0.59756400  | 0.57376400  | -1.39461600 |
|                                                                                                                                                                              | C | 0.47972200  | 0.47353600  | 1.45427900  |
|                                                                                                                                                                              | C | 1.21454000  | -0.58044200 | -0.73541300 |
|                                                                                                                                                                              | C | 1.15241700  | -0.63333600 | 0.76908300  |
|                                                                                                                                                                              | H | -0.76183000 | 2.16061200  | 1.27068100  |

|  |   |             |             |             |
|--|---|-------------|-------------|-------------|
|  | H | -0.65976600 | 2.24746600  | -1.19601100 |
|  | H | 0.77031200  | 0.71607400  | -2.45341000 |
|  | H | 0.56277100  | 0.53988600  | 2.53128700  |
|  | H | 2.02322100  | -1.09464100 | -1.24166300 |
|  | H | 1.91852900  | -1.18367700 | 1.30275500  |
|  | O | 0.33768500  | -1.46575600 | -0.04837500 |
|  | O | -2.54168600 | -0.64688800 | -0.06060500 |
|  | H | -3.03829400 | -1.45443600 | -0.20986800 |
|  | H | -1.61187200 | -0.91347700 | -0.06344700 |

|                                                                                                                                                                         |   |             |             |             |
|-------------------------------------------------------------------------------------------------------------------------------------------------------------------------|---|-------------|-------------|-------------|
| 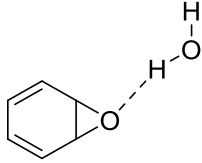 <p><i>exo-1</i>••H<sub>2</sub>O</p> <p>M06-2X-D3/def2-TZVP</p> <p>E = -383.693855</p> | C | -2.09566000 | 0.72493300  | 0.09450700  |
|                                                                                                                                                                         | C | -2.09561500 | -0.72501800 | 0.09449000  |
|                                                                                                                                                                         | C | -0.98661000 | -1.42599200 | -0.18374100 |
|                                                                                                                                                                         | C | -0.98670300 | 1.42598400  | -0.18373000 |
|                                                                                                                                                                         | C | 0.31028500  | -0.75398900 | -0.28891900 |
|                                                                                                                                                                         | C | 0.31022400  | 0.75407200  | -0.28895800 |
|                                                                                                                                                                         | H | -3.04377000 | 1.23510300  | 0.20886900  |
|                                                                                                                                                                         | H | -3.04369800 | -1.23524800 | 0.20881800  |
|                                                                                                                                                                         | H | -1.02916100 | -2.49335600 | -0.35799600 |
|                                                                                                                                                                         | H | -1.02932900 | 2.49334700  | -0.35797200 |
|                                                                                                                                                                         | H | 1.13126400  | -1.26183100 | -0.78213700 |
|                                                                                                                                                                         | H | 1.13119800  | 1.26195800  | -0.78212900 |
|                                                                                                                                                                         | O | 0.72491700  | 0.00002100  | 0.84595400  |
|                                                                                                                                                                         | O | 3.31898300  | -0.00002000 | -0.15085500 |
|                                                                                                                                                                         | H | 4.16223500  | 0.00012500  | 0.30604800  |
|                                                                                                                                                                         | H | 2.63454800  | -0.00003900 | 0.53382300  |

|  |   |             |            |             |
|--|---|-------------|------------|-------------|
|  | C | -0.31888600 | 1.43227500 | -0.67208600 |
|  | C | -0.31875100 | 1.43218900 | 0.67231200  |
|  | C | -0.76111600 | 0.31863300 | 1.49534800  |

|                                                                                                                                                                            |   |             |             |             |
|----------------------------------------------------------------------------------------------------------------------------------------------------------------------------|---|-------------|-------------|-------------|
| 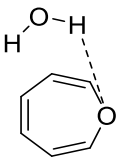 <p><i>endo-a-2••H<sub>2</sub>O</i></p> <p>M06-2X-D3/def2-TZVP</p> <p>E = -383.693083</p> | C | -0.76141500 | 0.31882500  | -1.49517600 |
|                                                                                                                                                                            | C | -0.66987200 | -0.96173200 | 1.14816600  |
|                                                                                                                                                                            | C | -0.67009800 | -0.96158500 | -1.14817800 |
|                                                                                                                                                                            | H | -0.05610400 | 2.34816200  | -1.18897500 |
|                                                                                                                                                                            | H | -0.05586700 | 2.34801000  | 1.18926600  |
|                                                                                                                                                                            | H | -1.20934300 | 0.53780600  | 2.45664700  |
|                                                                                                                                                                            | H | -1.20983500 | 0.53812300  | -2.45635600 |
|                                                                                                                                                                            | H | -1.04498000 | -1.77742400 | 1.75414300  |
|                                                                                                                                                                            | H | -1.04532800 | -1.77719800 | -1.75418500 |
|                                                                                                                                                                            | O | -0.01333700 | -1.37626300 | -0.00009800 |
|                                                                                                                                                                            | O | 2.69014600  | -0.09015300 | -0.00022400 |
|                                                                                                                                                                            | H | 2.24764900  | 0.76301000  | -0.00016800 |
|                                                                                                                                                                            | H | 1.96016300  | -0.72078200 | -0.00010200 |

|                                                                                                                                                                              |   |             |             |             |
|------------------------------------------------------------------------------------------------------------------------------------------------------------------------------|---|-------------|-------------|-------------|
| 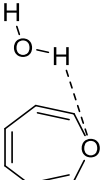 <p><i>endo-b-2••H<sub>2</sub>O</i></p> <p>M06-2X-D3/def2-TZVP</p> <p>E = -383.691735</p> | C | 0.24728300  | 1.39356500  | 0.74386100  |
|                                                                                                                                                                              | C | 0.45537700  | 1.43957900  | -0.58344800 |
|                                                                                                                                                                              | C | 1.02373400  | 0.35363500  | -1.36401200 |
|                                                                                                                                                                              | C | 0.56079900  | 0.25168900  | 1.58590900  |
|                                                                                                                                                                              | C | 0.85524500  | -0.93453100 | -1.07923700 |
|                                                                                                                                                                              | C | 0.50092100  | -1.01269400 | 1.17784900  |
|                                                                                                                                                                              | H | -0.10922300 | 2.28742200  | 1.24142400  |
|                                                                                                                                                                              | H | 0.25936200  | 2.36911500  | -1.10417300 |
|                                                                                                                                                                              | H | 1.63028500  | 0.59964900  | -2.22704100 |
|                                                                                                                                                                              | H | 0.87049200  | 0.43280900  | 2.60791800  |
|                                                                                                                                                                              | H | 1.31703300  | -1.74547100 | -1.62921700 |
|                                                                                                                                                                              | H | 0.77846700  | -1.86371600 | 1.78757700  |
|                                                                                                                                                                              | O | -0.00398300 | -1.34921000 | -0.07087400 |
|                                                                                                                                                                              | O | -2.69810100 | 0.08676600  | -0.29503000 |
|                                                                                                                                                                              | H | -3.20916300 | -0.71949800 | -0.39651100 |
|                                                                                                                                                                              | H | -1.78073600 | -0.20820700 | -0.23828200 |



|                                                                                                                                                                  |   |             |             |             |
|------------------------------------------------------------------------------------------------------------------------------------------------------------------|---|-------------|-------------|-------------|
| 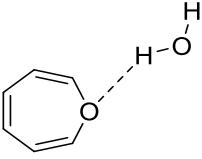 <p>exo-2••H<sub>2</sub>O</p> <p>M06-2X-D3/def2-TZVP</p> <p>E = -383.692100</p> | C | 2.09455100  | 0.67904800  | -0.15533500 |
|                                                                                                                                                                  | C | 2.10150600  | -0.66515600 | -0.15504900 |
|                                                                                                                                                                  | C | 0.98239800  | -1.49128900 | 0.26345600  |
|                                                                                                                                                                  | C | 0.96704700  | 1.49415300  | 0.26222900  |
|                                                                                                                                                                  | C | -0.29534400 | -1.14807600 | 0.12993500  |
|                                                                                                                                                                  | C | -0.30724100 | 1.13832600  | 0.12853200  |
|                                                                                                                                                                  | H | 3.01448700  | 1.19966000  | -0.39449500 |
|                                                                                                                                                                  | H | 3.02669700  | -1.17651400 | -0.39387700 |
|                                                                                                                                                                  | H | 1.19242200  | -2.44181400 | 0.73859200  |
|                                                                                                                                                                  | H | 1.16740000  | 2.44740800  | 0.73607800  |
|                                                                                                                                                                  | H | -1.12972800 | -1.73033900 | 0.50398200  |
|                                                                                                                                                                  | H | -1.14783700 | 1.71301300  | 0.50044000  |
|                                                                                                                                                                  | O | -0.67441700 | -0.00734600 | -0.56633100 |
|                                                                                                                                                                  | O | -3.40402000 | 0.00705500  | 0.11489100  |
|                                                                                                                                                                  | H | -4.14661500 | -0.04397600 | -0.49047700 |
|                                                                                                                                                                  | H | -2.60683500 | -0.00714500 | -0.43132800 |

## Literature references

- [1] W. Siebrand, T. A. Wildman, *Acc. Chem. Res.* **1986**, *19*, 238-243.
- [2] Y. Zhao, D. G. Truhlar, *Acc. Chem. Res.* **2008**, *41*, 157-167.
- [3] S. Grimme, J. Antony, S. Ehrlich, H. Krieg, *J. Chem. Phys.* **2010**, *132*, 154104.
- [4] F. Weigend, R. Ahlrichs, *Phys. Chem. Chem. Phys.* **2005**, *7*, 3297-3305.
- [5] M. J. Frisch, G. W. Trucks, H. B. Schlegel, G. E. Scuseria, M. A. Robb, J. R. Cheeseman, G. Scalmani, V. Barone, G. A. Petersson, H. Nakatsuji, X. Li, M. Caricato, A. V. Marenich, J. Bloino, B. G. Janesko, R. Gomperts, B. Mennucci, H. P. Hratchian, J. V. Ortiz, A. F. Izmaylov, J. L. Sonnenberg, Williams, F. Ding, F. Lipparini, F. Egidi, J. Goings, B. Peng, A. Petrone, T. Henderson, D. Ranasinghe, V. G. Zakrzewski, J. Gao, N. Rega, G. Zheng, W. Liang, M. Hada, M. Ehara, K. Toyota, R. Fukuda, J. Hasegawa, M. Ishida, T. Nakajima, Y. Honda, O. Kitao, H. Nakai, T. Vreven, K. Throssell, J. A. Montgomery Jr., J. E. Peralta, F. Ogliaro, M. J. Bearpark, J. J. Heyd, E. N. Brothers, K. N. Kudin, V. N. Staroverov, T. A. Keith, R. Kobayashi, J. Normand, K. Raghavachari, A. P. Rendell, J. C. Burant, S. S. Iyengar, J. Tomasi, M. Cossi, J. M. Millam, M. Klene, C. Adamo, R. Cammi, J. W. Ochterski, R. L. Martin, K. Morokuma, O. Farkas, J. B. Foresman, D. J. Fox, Wallingford, CT, **2009**.
- [6] H.-J. Werner, P. J. Knowles, G. Knizia, F. R. Manby, M. Schütz, *Wiley. Interdiscip. Rev. Comput. Mol. Sci.* **2012**, *2*, 242-253.

- [7] L. A. Montero, A. M. Esteva, J. Molina, A. Zapardiel, L. Hernandez, H. Marquez, A. Acosta, *J. Am. Chem. Soc.* **1998**, *120*, 12023-12033.
- [8] aA. Ravi, P. S. Krishnarao, T. A. Shumilova, V. N. Khrustalev, T. Ruffer, H. Lang, E. A. Kataev, *Org. Lett.* **2018**, *20*, 6211-6214; bS. Da Silva Pinto, S. G. Davies, A. M. Fletcher, P. M. Roberts, J. E. Thomson, *Org. Lett.* **2019**, *21*, 7933-7937; cJ. R. Gillard, M. J. Newlands, J. N. Bridson, D. J. Burnell, *Can. J. Chem.* **1991**, *69*, 1337-1343.
